# Supplementary material for: Incidence, microbiology, and outcomes of endophthalmitis after 111,876 pars plana vitrectomies at a single, tertiary eye care hospital
Source: PubMed Central journal article supplement (PMC5770060; doi:10.1371/journal.pone.0191173), 2018-01-16
Supplement: pone.0191173.s003.pdf [file pone.0191173.s003.pdf]

# VISION RESEARCH FOUNDATION

[Regd. Under Act XXI of 1860]

New No.41, Old No.18, College Road, Chennai - 600 006

**Dr. LINGAM GOPAL**, MS., DNBE., FRCS Ed.  
President

**Dr. S. BHASKARAN**, MD., DM (CARD)  
Hony. Secretary

**R. S. FALOR**, B.Com., FCA, LLB, DBM  
Hony. Treasurer

**Dr. K. S. VASAN**, PhD  
Chief Operation Officer

**Dr. RONNIE JACOB GEORGE**, D.O., D.N.B., M.S  
Director-Research

Dr. Muna Bhende  
Senior Consultant,  
Shri Bhagwan Mahavir Vitreoretinal Services  
Medical Research Foundation  
Chennai

Dear Sir,

Sub: Institutional Review Board (Ethics Committee) Exemption for the project  
"Incidence, Microbiology, and Outcomes of Endophthalmitis after 111,876 Pars Plana  
Vitreotomies at a Single, Tertiary Eye Care Hospital"

Your proposal titled "Incidence, Microbiology, and Outcomes of Endophthalmitis after  
111,876 Pars Plana Vitrectomies at a Single, Tertiary Eye Care Hospital", was reviewed  
by the institution review board and has been approved.

Yours sincerely,

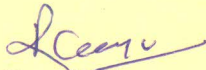

Dr. Ronnie George  
Member  
Institutional Review Board (Ethics Committee)  
Vision Research Foundation  
Chennai.

**INSTITUTIONAL REVIEW BOARD  
(ETHICS COMMITTEE)  
VISION RESEARCH FOUNDATION  
No. 41 / 18, College Road,  
Chennai - 600 006. INDIA**
